# Supplementary material for: Antimicrobial and Antivirulence Activities of Carvacrol against Pathogenic Aeromonas hydrophila
Source: MDPI journal article supplement (doi:10.3390/microorganisms10112170), 2022-10-31
Supplement: s1 [file s1]

## Supplementary Materials

**Table S1.** Primer sequences for real-time PCR.

| Primers     | Gene function                                | Sequence (5'→3')                                    | Reference |
|-------------|----------------------------------------------|-----------------------------------------------------|-----------|
| <i>ropB</i> | Housekeeping gene                            | F:ACCGACGAAGTGGACTATCT<br>R:CGGCGTTCATAAAGGTGGAT    | [31]      |
| <i>flaB</i> | Motility and adhesion: polar flagellin B     | F:CAGTCTGAACCAGACAGGTG<br>R:CAGCCATTACGTTTTGAGCC    | [31]      |
| <i>aha</i>  | Adhesion: adhesin                            | F: AAGCCGTCAAGGTTACTGAC<br>R: GTCACCAGTGTTGTTGGTCT  | [31]      |
| <i>ompA</i> | Porin and adhesion: outer membrane protein A | F: TGGATCTGCAAGCTCGTTAC<br>R:CTACGTAGGAAGTGCGGAAC   | [31]      |
| <i>ahp</i>  | Enzyme: serine protease                      | F: TCTATGCGCTGGAGTCGTTC<br>R: AGGACATGCCCCACGTTGTAG | [31]      |
| <i>ela</i>  | Enzyme: elastase                             | F: TACCGCAACTGGTACAACAC<br>R:CGGAGTTCTGCTCGGTAAAG   | [31]      |
| <i>act</i>  | Toxin: cytolytic centerotoxin                | F: TCAAGGCCGATGTCAGCTAT<br>R: GTCCCACTGGTAACGAATGC  | [31]      |
| <i>aerA</i> | Enzyme: aerolysin                            | F:AGGAGATGTCAGCCTTGTAG<br>R: TTACGATACCGCCACCAACT   | [63]      |
| <i>hly</i>  | Toxin: hemolysin                             | F: TCTACCTCAACGTCAACCGC<br>R: TCCGCACTATCTTGGCATCC  | [31]      |
| <i>AhyR</i> | Quorum system                                | F: TCTTGACGTGATGGGGTTGG<br>R: GGCGGTGATGAACGACAGTA  | [64]      |

**Table S2.** Fractional inhibitory concentration (FIC) and fractional inhibitory concentration index (FICI) of carvacrol in association with different combinations of the antimicrobials florfenicol (FLF), enrofloxacin (ENF), doxycycline hyclate (DOH), thiamphenicol (THM), and neomycin sulfate (NES) against *Aeromonas hydrophila* NJ-35.

| Test substance | MIC (µg/ml) |          | FIC   | FICI               |
|----------------|-------------|----------|-------|--------------------|
|                | Isolate     | Combined |       |                    |
| Carvacrol-FLF  |             |          |       |                    |
| Carvacrol      | 125.000     | 125.000  | 1.000 | 1.063 <sup>c</sup> |
| FLF            | 1.250       | 0.078    | 0.063 |                    |
| Carvacrol-ENF  |             |          |       |                    |
| Carvacrol      | 125.000     | 125.000  | 1.000 | 1.100 <sup>c</sup> |
| ENF            | 0.010       | 0.001    | 0.100 |                    |
| Carvacrol-DOH  |             |          |       |                    |
| Carvacrol      | 125.000     | 125.000  | 1.000 | 1.062 <sup>c</sup> |
| DOH            | 0.625       | 0.039    | 0.062 |                    |
| Carvacrol-THM  |             |          |       |                    |
| Carvacrol      | 125.000     | 125.000  | 1.000 | 1.500 <sup>c</sup> |
| THM            | 2.500       | 1.250    | 0.500 |                    |
| Carvacrol-NES  |             |          |       |                    |
| Carvacrol      | 125.000     | 7.813    | 0.063 | 0.563 <sup>b</sup> |
| NES            | 20.000      | 10.000   | 0.500 |                    |

<sup>b</sup> Additivity; <sup>c</sup> Indifferent; MIC, minimum inhibitory concentration.

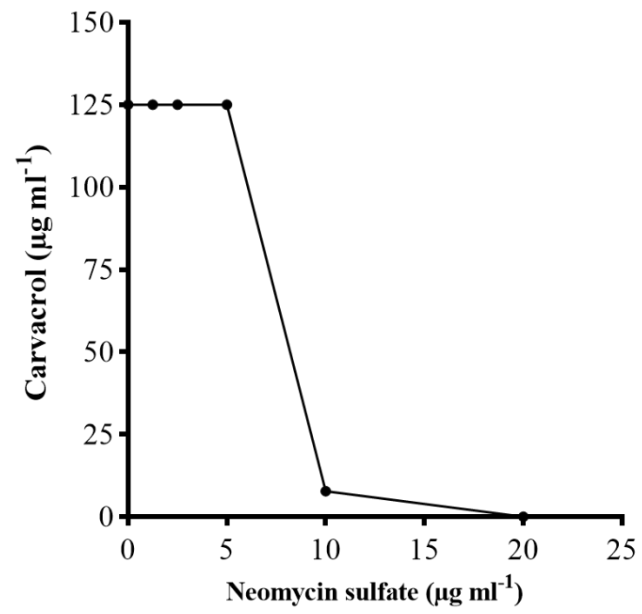

**Figure S1:** Isobolograms. Carvacrol combined with the neomycin sulfate against *A. hydrophila* NJ-35 (FICI = 0.563). FICI, fractional inhibitory concentration index.
